# Supplementary material for: Systematic Genomic Surveillance of SARS-CoV-2 Virus on Illumina Sequencing Platforms in the Slovak Republic—One Year Experience
Source: MDPI journal article supplement (doi:10.3390/v14112432), 2022-11-02
Supplement: s1 [file s1]

**Supplementary Table S1.** Districts of SR with number of total sequenced positive SARS-CoV-2 samples.

| District        | No. of samples | District          | No. of samples | District             | No. of samples | District             | No. of samples |
|-----------------|----------------|-------------------|----------------|----------------------|----------------|----------------------|----------------|
| Bratislava      | 3894           | Myjava            | 437            | Pezinok              | 198            | Bánovce nad Bebravou | 82             |
| Poprad          | 1808           | Brezno            | 390            | Lučenec              | 180            | Partizánske          | 79             |
| Trenčín         | 1726           | Martin            | 387            | Považská Bystrica    | 179            | Banská Štiavnica     | 77             |
| Prešov          | 1621           | Sabinov           | 377            | Snina                | 162            | Šaľa                 | 76             |
| Ilava           | 1300           | Michalovce        | 368            | Piešťany             | 151            | Žarnovica            | 74             |
| Košice          | 1067           | Ružomberok        | 356            | Žiar nad Hronom      | 147            | Levoča               | 68             |
| Trnava          | 913            | Prievidza         | 341            | Zvolen               | 139            | Rožňava              | 64             |
| Nitra           | 705            | Tvrdošín          | 340            | Sobrance             | 133            | Bytča                | 62             |
| Malacky         | 641            | Námestovo         | 327            | Topoľčany            | 129            | Krupina              | 60             |
| Banská Bystrica | 632            | Senica            | 277            | Humenné              | 128            | Zlaté Moravce        | 58             |
| Komárno         | 593            | Čadca             | 255            | Bardejov             | 127            | Rimavská Sobota      | 57             |
| Žilina          | 591            | Púchov            | 255            | Kysucké Nové Mesto   | 119            | Dolný Kubín          | 52             |
| Trebišov        | 580            | Kežmarok          | 244            | Stropkov             | 109            | Gelnica              | 48             |
| Nové Zámky      | 518            | Dunajská Streda   | 240            | Nové Mesto nad Váhom | 107            | Turčianske Teplice   | 48             |
| Galanta         | 489            | Liptovský Mikuláš | 239            | Veľký Krtíš          | 102            | Revúca               | 38             |
| Skalica         | 476            | Spišská Nová Ves  | 239            | Svidník              | 92             | Poltár               | 29             |
| Košice - okolie | 474            | Levice            | 215            | Vranov nad Topľou    | 91             | Detva                | 23             |
| Senec           | 470            | Stará Ľubovňa     | 210            | Hlohovec             | 85             | Medzilaborce         | 21             |

**Supplementary Table S2.** List of 165 lineages detected from March 1, 2021 up to March 31, 2022.

| Lineage   | No. of samples | Lineage   | No. of samples | Lineage   | No. of samples | Lineage    | No. of samples | Lineage   | No. of samples |
|-----------|----------------|-----------|----------------|-----------|----------------|------------|----------------|-----------|----------------|
| BA.2      | 4268           | AY.5      | 52             | AY.9      | 15             | AY.3       | 3              | B.1.617.1 | 1              |
| BA.1.1    | 3390           | BA.1.14   | 52             | AY.113    | 14             | AY.105     | 3              | B.1.1     | 1              |
| B.1.1.7   | 3143           | AY.23     | 50             | AY.41     | 13             | AY.4.9     | 3              | B.1.1.523 | 1              |
| AY.43     | 3127           | AY.84     | 44             | BA.2.25   | 13             | AY.5.4     | 3              | B.1.621.1 | 1              |
| AY.4      | 1587           | AY.60     | 44             | B.1.258   | 12             | AY.33.2    | 3              | Q.7       | 1              |
| AY.122    | 1500           | AY.70     | 42             | AY.117    | 11             | BA.1.1.16  | 3              | B.1.619   | 1              |
| BA.1      | 1376           | BA.2.25.1 | 42             | AY.120    | 10             | BA.2.23    | 3              | AY.69     | 1              |
| BA.2.9    | 1330           | AY.125    | 39             | AY.98     | 10             | B.1        | 2              | AY.110    | 1              |
| AY.9.2    | 1007           | BA.1.1.4  | 39             | AY.53     | 9              | A          | 2              | AY.54     | 1              |
| BA.1.1.1  | 994            | BA.1.15.1 | 38             | AY.23.2   | 9              | C.36       | 2              | A.29      | 1              |
| AY.126    | 672            | BA.1.1.11 | 35             | BA.1.13   | 9              | B.1.621    | 2              | AY.93     | 1              |
| AY.43.9   | 596            | AY.129    | 34             | AY.33     | 8              | AY.1       | 2              | AY.37     | 1              |
| BA.1.17.2 | 502            | AY.94     | 31             | AY.25.1   | 8              | AY.46.4    | 2              | AY.5.5    | 1              |
| BA.1.18   | 367            | AY.127    | 30             | B.1.160   | 7              | AZ.2       | 2              | AY.4.14   | 1              |
| AY.98.1   | 290            | BA.1.8    | 27             | B.3       | 6              | AY.46.5    | 2              | AY.16     | 1              |
| B.1.617.2 | 287            | BA.1.21   | 27             | AY.44     | 6              | AY.106     | 2              | AY.128    | 1              |
| AY.46.6   | 271            | BA.2.5    | 27             | AY.4.5    | 6              | AY.100     | 2              | AY.134    | 1              |
| AY.42     | 206            | AY.6      | 26             | AY.121.1  | 6              | AY.32      | 2              | AY.46.2   | 1              |
| BA.1.17   | 206            | AY.4.7    | 25             | BA.1.12   | 6              | AY.34.1    | 2              | AY.4.16   | 1              |
| BA.1.15   | 173            | BA.1.1.14 | 25             | AY.103    | 5              | AY.88      | 2              | AY.39.1.1 | 1              |
| AY.68     | 159            | AY.20     | 23             | AY.43.8   | 5              | AY.36.1    | 2              | AY.83     | 1              |
| AY.46     | 142            | AY.7.1    | 22             | BA.1.21.1 | 5              | AY.4.17    | 2              | AY.51     | 1              |
| AY.112    | 140            | AY.20.1   | 22             | BA.2.12   | 5              | AY.4.2.2   | 2              | AY.45     | 1              |
| AY.4.4    | 112            | AY.36     | 22             | B.1.1.1   | 4              | AY.43.4    | 2              | AY.118    | 1              |
| AY.39     | 112            | BA.1.1.18 | 20             | C.36.3    | 4              | BA.1.10    | 2              | AY.4.2.4  | 1              |
| BA.2.3    | 110            | B.1.351   | 19             | AY.78     | 4              | BA.1.1.13  | 2              | AY.127.1  | 1              |
| AY.121    | 103            | AY.34     | 19             | AY.75     | 4              | BA.1.1.17  | 2              | BA.1.1.2  | 1              |
| BA.1.20   | 102            | BA.2.1    | 19             | AY.25     | 4              | BA.1.16    | 2              | BA.1.1.7  | 1              |
| BA.1.19   | 92             | AY.124    | 18             | AY.87     | 4              | BA.2.19    | 2              | BA.1.9    | 1              |
| AY.26     | 81             | AY.4.2    | 18             | AY.102    | 4              | B.1.177.32 | 1              | BA.1.1.12 | 1              |
| AY.4.13   | 76             | BA.1.1.15 | 17             | Q.1       | 3              | B.1.1.192  | 1              | BA.1.1.10 | 1              |
| BA.2.10   | 72             | AY.4.6    | 16             | B.1.1.170 | 3              | AY.71      | 1              | BA.1.5    | 1              |
| AY.4.2.3  | 66             | BA.1.6    | 16             | AY.7.2    | 3              | C.38       | 1              | BA.2.32   | 1              |
